# Supplementary material for: Home environmental interventions for prevention of respiratory tract infections: a systematic review and meta-analysis
Source: publisher site journal article supplement (doi:10.1515/reveh-2020-0169), 2021-02-03
Supplement: Supplementary file 1 [file j_reveh-2020-0169_suppl_001.docx]

**Supplementary Figure 1: Risk of bias summary delineating authors' judgements about each risk of bias item for each included study.**

**
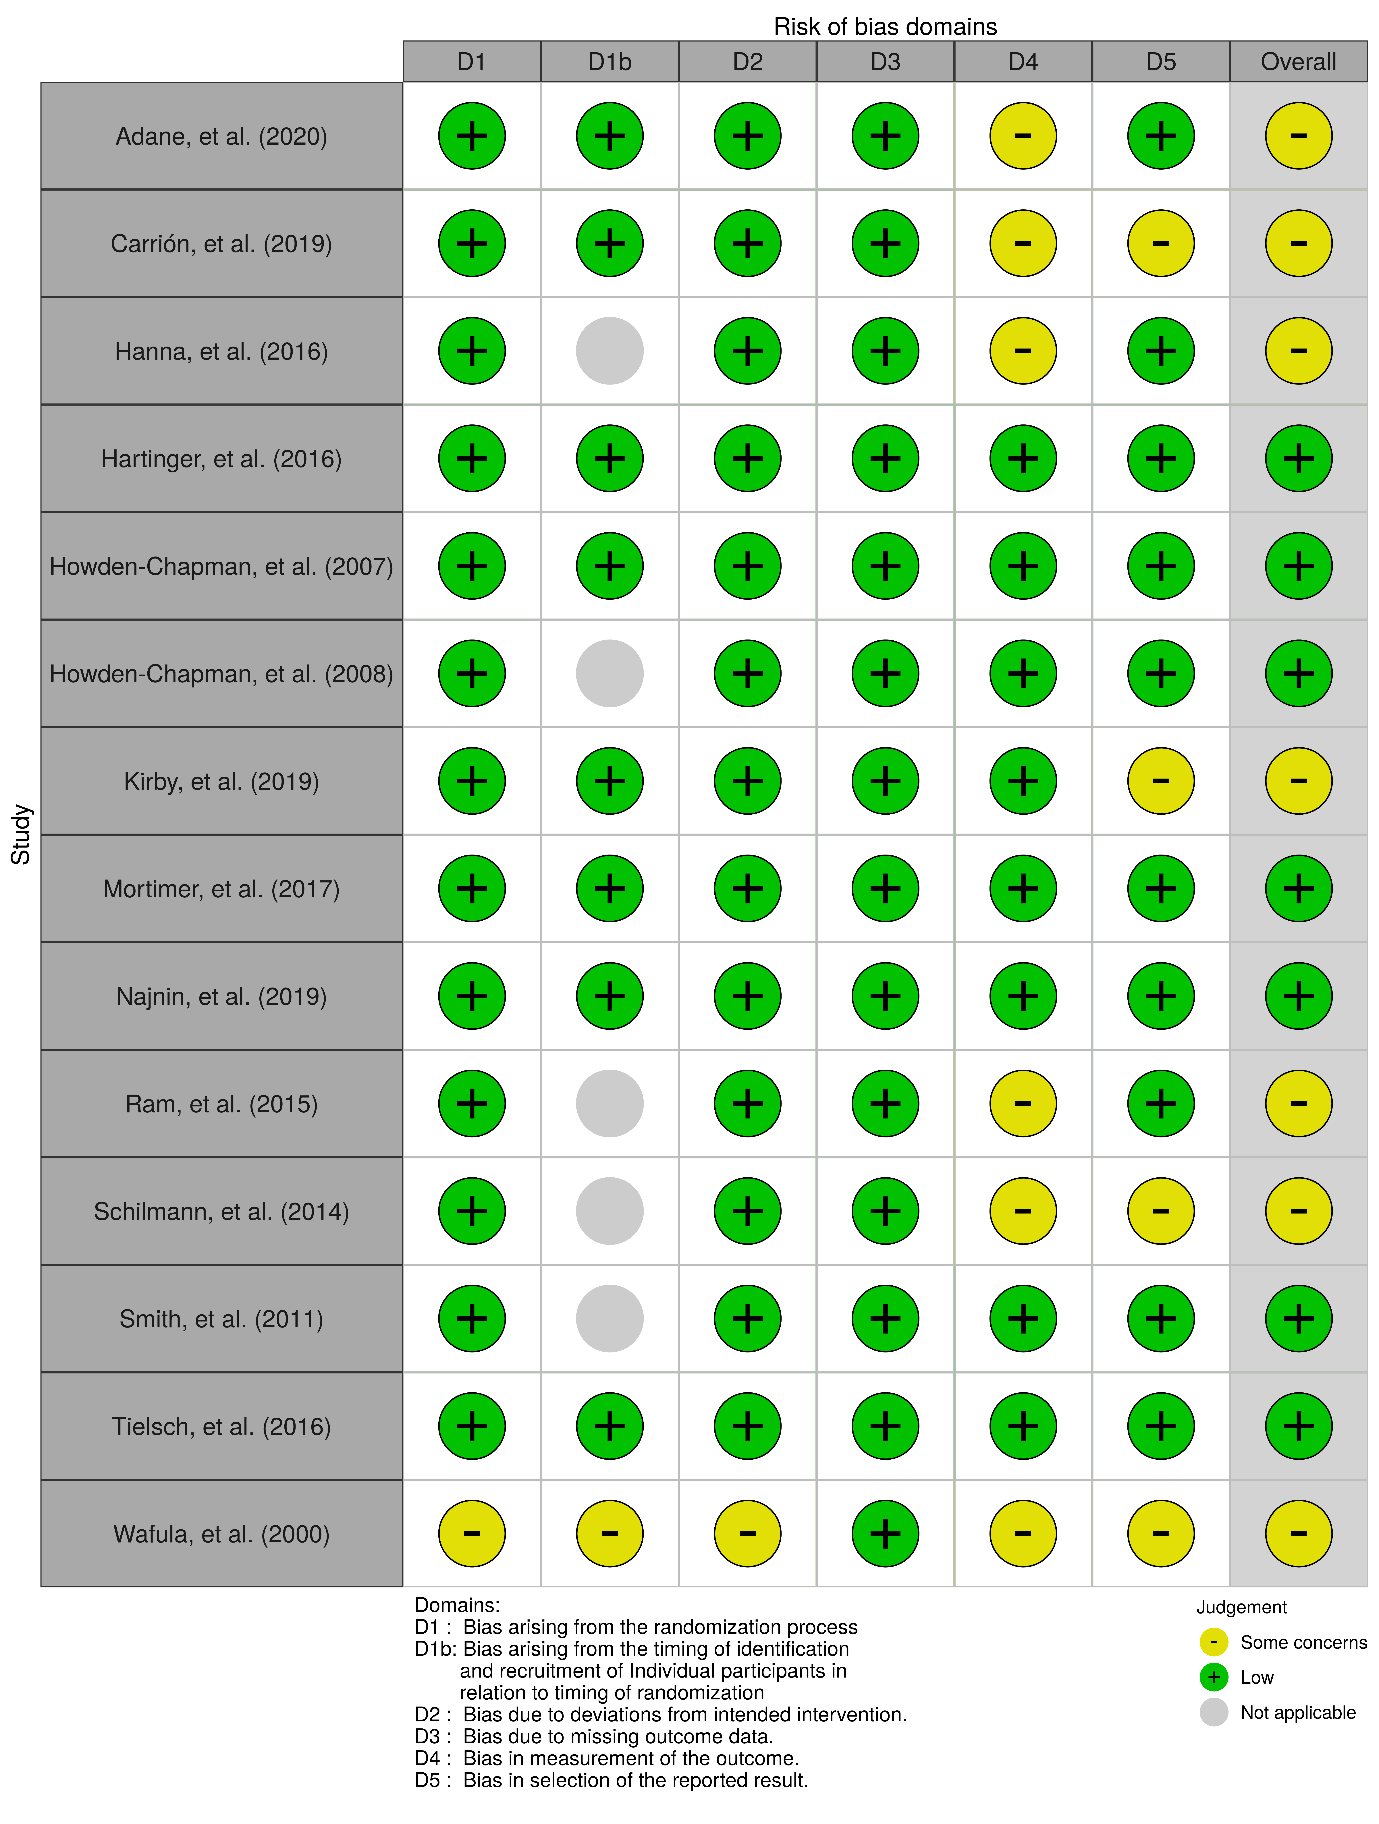
**

**Supplementary Figure 2: Forest plot of the effect of housing intervention versus control on severe pneumonia.**

**
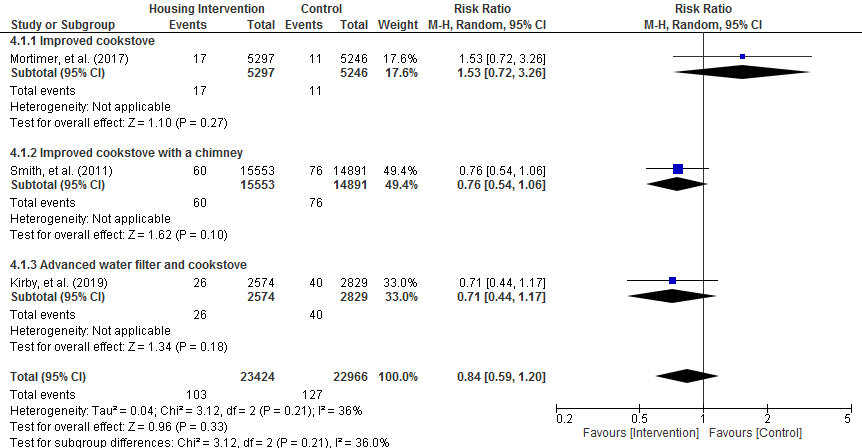
**

**Supplementary Figure 3: Forest plot of the effect of improved cookstove versus traditional stove on burns.**

**
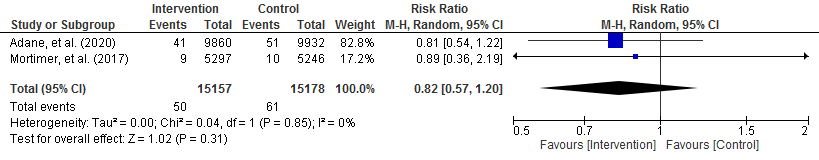
**

**Supplementary Figure 4: Forest plot of the effect of improved cookstove versus traditional stove on any reported adverse events.**

**
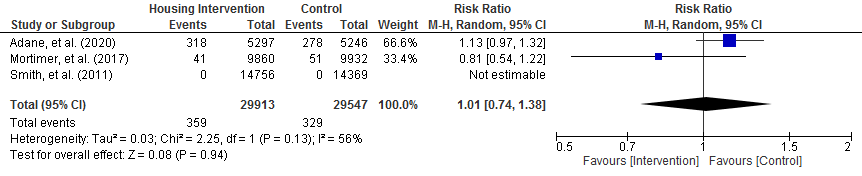
**

**Supplementary Figure 5: Forest plot of the effect of housing intervention versus control on any reported respiratory tract infections stratified by country income categories.**

**
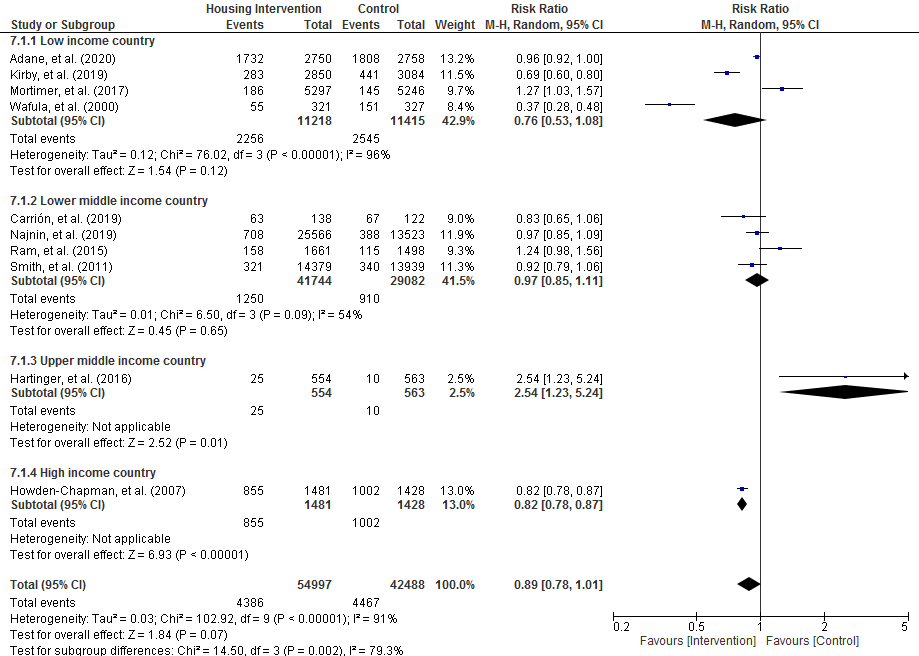
**

**Supplementary Figure 6: Pooling of effect estimates reported in individual studies.**

**[A] Any respiratory tract infections (risk ratio)**

**[B] Lower respiratory tract infections (odds ratio)**

**[C] Lower respiratory tract infections (risk ratio)**

**[D] Severe pneumonia (incidence rate ratio)**
